# Supplementary material for: Delayed transplantation of precursor cell-derived astrocytes provides multiple benefits in a rat model of Parkinsons
Source: PubMed Central journal article supplement (PMC3992077; doi:10.1002/emmm.201302878), 2014-01-29
Supplement: emmm0006-0504-sd2.pdf [file emmm0006-0504-sd2.pdf]

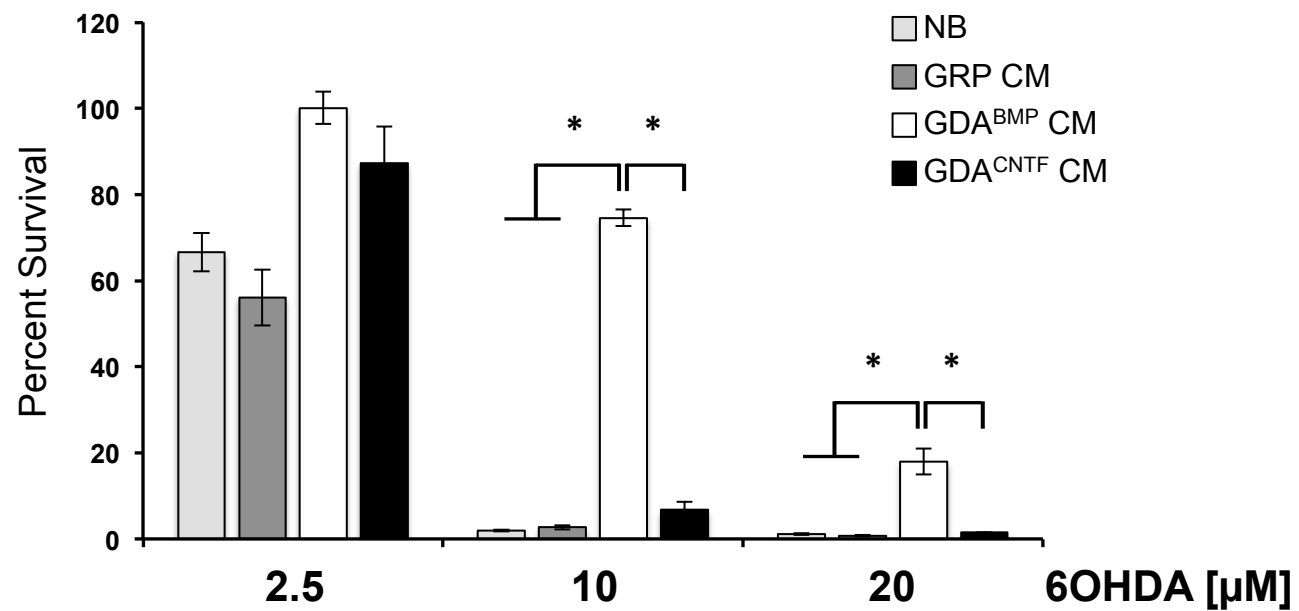

**SI Figure 1: GDAs<sup>BMP</sup> promote survival of cortical neurons exposed to 6-OHDA in vitro.** Survival of cortical neurons in neurobasal medium (NB), GRP-, GDA<sup>BMP</sup>- or GDA<sup>CNTF</sup>-conditioned medium (CM) after addition of increasing doses of 6-OHDA. Mean ± S.E.M., n=3.
