# Supplementary material for: Delayed transplantation of precursor cell-derived astrocytes provides multiple benefits in a rat model of Parkinsons
Source: PubMed Central journal article supplement (PMC3992077; doi:10.1002/emmm.201302878), 2014-01-29
Supplement: emmm0006-0504-sd3.pdf [file emmm0006-0504-sd3.pdf]

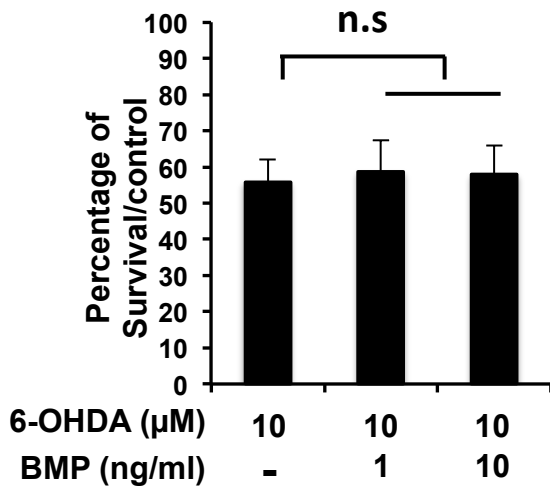

**SI Figure 2: BMP4 does not protect striatal TH+ neurons against 6-OHDA toxicity.**

Striatal neuron cultures were prepared as in Figure 2, and treated in with 10uM 6-OHDA, with or without direct addition of BMP4. Mean  $\pm$  S.E.M., n=3. \*p<0.05 by ANOVA/ Bonferroni Multiple Comparison post-test.
