# Supplementary material for: Delayed transplantation of precursor cell-derived astrocytes provides multiple benefits in a rat model of Parkinsons
Source: PubMed Central journal article supplement (PMC3992077; doi:10.1002/emmm.201302878), 2014-01-29
Supplement: emmm0006-0504-sd4.pdf [file emmm0006-0504-sd4.pdf]

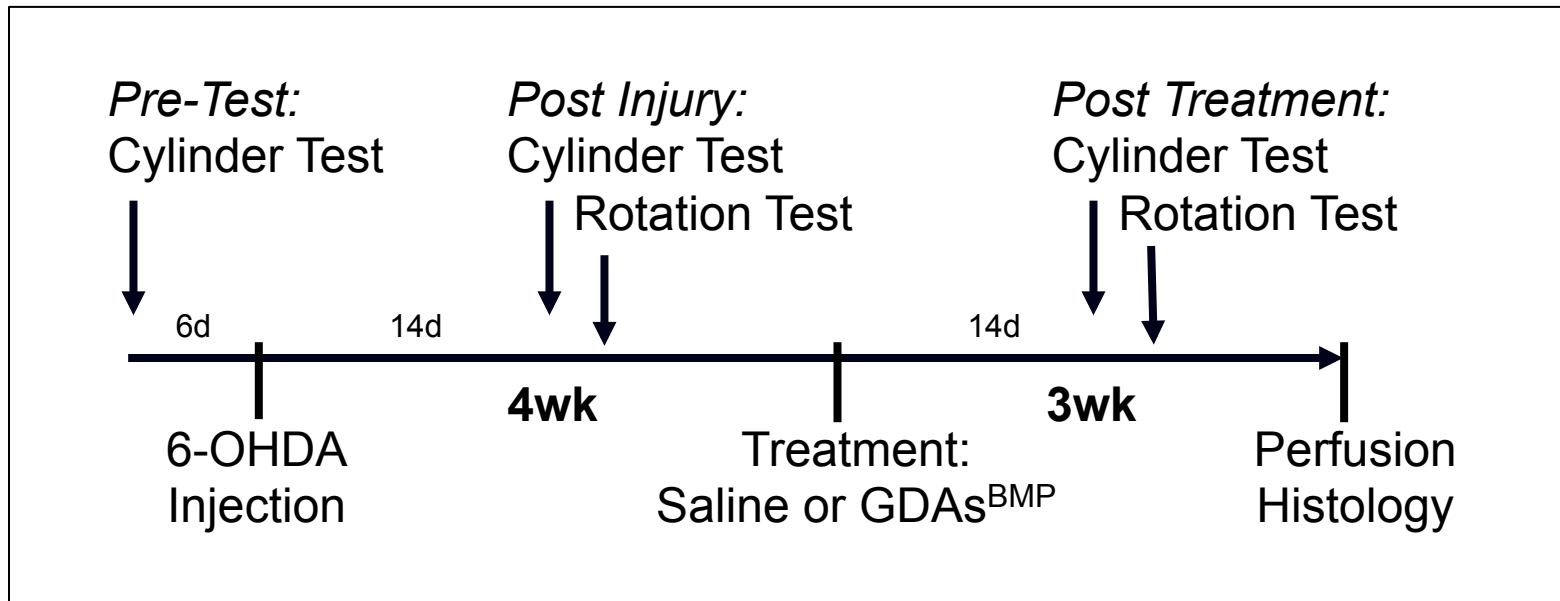

**SI Figure 3: Experimental time line of in vivo experiments.** See material and methods for details of procedures.
