# Supplementary material for: Delayed transplantation of precursor cell-derived astrocytes provides multiple benefits in a rat model of Parkinsons
Source: PubMed Central journal article supplement (PMC3992077; doi:10.1002/emmm.201302878), 2014-01-29
Supplement: emmm0006-0504-sd5.pdf [file emmm0006-0504-sd5.pdf]

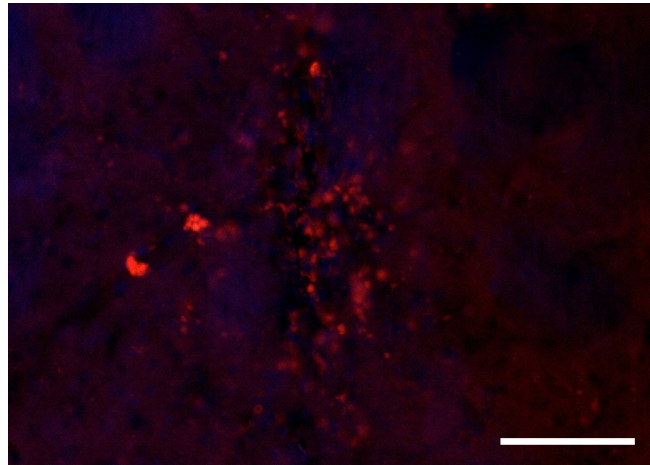

**SI Figure 4: Transplanted hGDAs<sup>BMP</sup> persist in the rat striatum.** Human mitochondrial (hMA) staining of transplanted cells. Scale bar 100nm.
