# Supplementary material for: Delayed transplantation of precursor cell-derived astrocytes provides multiple benefits in a rat model of Parkinsons
Source: PubMed Central journal article supplement (PMC3992077; doi:10.1002/emmm.201302878), 2014-01-29
Supplement: emmm0006-0504-sd6.pdf [file emmm0006-0504-sd6.pdf]

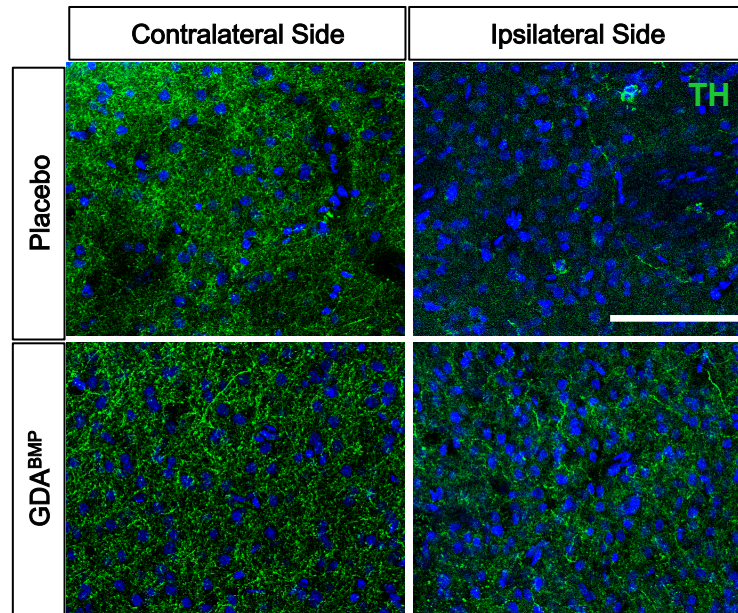

**SI Figure 5: GDAs<sup>BMP</sup> promote recovery of tyrosine hydroxylase expression in 6-OHDA lesioned animals.** Tyrosine hydroxylase (TH) staining in matched sections of the ipsi and contralateral striatum of placebo and GDA<sup>BMP</sup> treated animals. Blue channel in shows DAPI counterstaining. Scale bar = 100  $\mu$ m.
