# Supplementary material for: Delayed transplantation of precursor cell-derived astrocytes provides multiple benefits in a rat model of Parkinsons
Source: PubMed Central journal article supplement (PMC3992077; doi:10.1002/emmm.201302878), 2014-01-29
Supplement: emmm0006-0504-sd8.pdf [file emmm0006-0504-sd8.pdf]

# Table of Contents

- Figure 1: GDAs<sup>BMP</sup> promote survival of cortical neurons exposed to 6-OHDA in vitro. Page 1
- Figure 2: BMP4 does not protect striatal TH+ neurons against 6-OHDA toxicity. Page 2
- Figure 3: Experimental time line of in vivo experiments. See material and methods for details of procedures. Page 3
- Figure 4: Transplanted hGDAs<sup>BMP</sup> persist in the rat striatum. Page 4
- Figure 5: GDAs<sup>BMP</sup> promote recovery of tyrosine hydroxylase expression in 6-OHDA lesioned animals. Page 5
- Figure 6: GDAs<sup>BMP</sup> promote recovery of synaptophysin expression in 6-OHDA lesioned animals. Page 6
